# Supplementary material for: Impact of CYP2C9 and VKORC1 Polymorphisms on Warfarin Sensitivity and Responsiveness in Jordanian Cardiovascular Patients during the Initiation Therapy
Source: PubMed Central journal article supplement (PMC6316567; doi:10.3390/genes9120578), 2018-11-27
Supplement: genes-09-00578-s001.pdf [file genes-09-00578-s001.pdf]

**Table S1:** Single Nucleotide Polymorphisms (SNPs) ID, their position and genotyping data based on whole cohort ( $N = 220$ ).

| Gene          | SNP ID      | Chr Position <sup>a</sup> | SNP | SNP Type           | Discrepancy rate <sup>b</sup> | Call rate <sup>c</sup> |
|---------------|-------------|---------------------------|-----|--------------------|-------------------------------|------------------------|
| <i>VKORC1</i> | rs104894539 | 16:31094645               | C/A | Missense variant   | 0.06%                         | 96%                    |
|               | rs104894540 | 16:31094596               | A/G | Missense variant   | 0.04%                         | 96%                    |
|               | rs104894541 | 16:31094558               | T/C | Missense variant   | 0.07%                         | 96%                    |
|               | rs104894542 | 16:31091243               | A/C | Missense variant   | 0.05%                         | 96%                    |
|               | rs61742245  | 16:31094624               | C/A | Missenses variant  | 0.03%                         | 97%                    |
|               | rs10871454  | 16:31036758               | C/T | Exonic variant     | 0.12%                         | 97%                    |
|               | rs8050894   | 16:31093188               | G/C | Intronic variant   | 0.03%                         | 97%                    |
|               | rs9934438   | 16:31093557               | G/A | Intronicvariant    | 0.12%                         | 96%                    |
|               | rs17708472  | 16:31094032               | C/T | Exonic variant     | 0.00%                         | 97%                    |
| <i>CYP2C9</i> | rs1799853   | 10:94942290               | C/T | Missense variant   | 0.15%                         | 96%                    |
|               | rs28371685  | 10:94981224               | C/T | Missense variant   | 0.07%                         | 97%                    |
|               | rs28371686  | 10:94981301               | C/G | Missense variant   | 0.05%                         | 97%                    |
|               | rs4086116   | 10:94947445               | C/T | Intronic variant   | 0.04%                         | 96%                    |
|               | rs72558191  | 10:94947919               | T/G | Missense variant   | 0.07%                         | 97%                    |
|               | rs9332131   | 10:94949282               | Del | Frameshift variant | 0.05%                         | 96%                    |
|               | rs9332239   | 10:94989020               | C/T | Missense variant   | 0.03%                         | 97%                    |
|               | rs1057910   | 10:94981296               | A/C | Missense variant   | 0.03%                         | 97%                    |

<sup>a</sup>. Chromosome positions are based on NCBI Human Genome Assembly Build.

<sup>b</sup>. Ratio of the number of discordant genotypes to the number of duplicates.

<sup>c</sup>. Ratio of the number of valid genotypes to the number of subjects genotyped ( $n = 220$ ) at each locus

**Table S2:** List of SNPs, their minor allele frequencies, and HWE  $p$  values for genotypic distribution at each locus based on 220 patients

| Gene   | SNP ID      | MA <sup>a</sup> | MAF <sup>b</sup> | HWE <sup>c</sup> $p$ value |
|--------|-------------|-----------------|------------------|----------------------------|
| VKORC1 | rs104894539 | A               | n/a*             | n/a*                       |
|        | rs104894540 | G               | n/a*             | n/a*                       |
|        | rs104894541 | C               | n/a*             | n/a*                       |
|        | rs104894542 | C               | n/a*             | n/a*                       |
|        | rs61742245  | A               | n/a*             | n/a*                       |
|        | rs10871454  | C               | 0.48             | 0.568                      |
|        | rs8050894   | C               | 0.47             | 0.525                      |
|        | rs9934438   | G               | 0.49             | 0.487                      |
|        | rs17708472  | A               | 0.13             | 0.730                      |
| CYP2C9 | rs1799853   | T               | 0.12             | 0.531                      |
|        | rs28371685  | T               | n/a*             | n/a*                       |
|        | rs28371686  | G               | n/a*             | n/a*                       |
|        | rs4086116   | T               | 0.23             | 0.550                      |
|        | rs72558191  | G               | n/a*             | n/a*                       |
|        | rs9332131   | Del             | n/a*             | n/a*                       |
|        | rs9332239   | T               | n/a*             | n/a*                       |
|        | rs1057910   | C               | 0.1              | 0.119                      |

<sup>a</sup>MA: Minor allele.

<sup>b</sup>MAF: Minor allele frequency.

<sup>c</sup>HWE: Hardy-Weinberg equilibrium.

\*n/a: not applicable (nonpolymorphic)

**Table S3:** The frequency of the allele and genotype for all polymorphisms in cardiovascular patients treated with warfarin.

| Gene       | SNP ID      | Allele/Genotype | % (n)          |
|------------|-------------|-----------------|----------------|
| VKORC1     | rs104894539 | C               | 100% (n = 422) |
|            |             | A               | 0%             |
|            |             | CC              | 100% (n = 211) |
|            |             | CA              | 0%             |
|            |             | AA              | 0%             |
|            | rs104894540 | A               | 100% (n = 422) |
|            |             | G               | 0%             |
|            |             | AA              | 100% (n = 211) |
|            |             | AG              | 0%             |
|            |             | GG              | 0%             |
|            | rs104894541 | T               | 100% (n = 424) |
|            |             | C               | 0%             |
|            |             | TT              | 100% (n = 212) |
|            |             | TC              | 0%             |
|            |             | CC              | 0%             |
|            | rs104894542 | A               | 100% (n = 424) |
|            |             | C               | 0%             |
|            |             | AA              | 100% (n = 212) |
|            |             | AC              | 0%             |
|            |             | CC              | 0%             |
|            | rs61742245  | C               | 99% (n = 420)  |
|            |             | A               | 1% (n = 4)     |
|            |             | CC              | 98% (n = 208)  |
|            |             | CA              | 2% (n = 4)     |
|            |             | AA              | 0%             |
| rs10871454 | C           | 48% (n = 204)   |                |
|            | T           | 52% (n = 220)   |                |
|            | CC          | 22% (n = 47)    |                |
|            | CT          | 52% (n = 110)   |                |
|            | TT          | 26% (n = 55)    |                |

Table S3 (continued)

| Gene   | SNP ID     | Allele/Genotype | % (n)           |
|--------|------------|-----------------|-----------------|
|        | rs8050894  | C               | 46% (n = 196)   |
|        |            | G               | 54% (n = 228)   |
|        |            | CC              | 20% (n = 43)    |
|        |            | GC              | 52% (n = 110)   |
|        |            | GG              | 28% (n = 59)    |
|        | rs9934438  | G               | 49% (n = 207)   |
|        |            | A               | 51% (n = 217)   |
|        |            | GG              | 23% (n = 48)    |
|        |            | AG              | 52% (n = 111)   |
|        |            | AA              | 25% (n = 53)    |
|        | rs17708472 | G               | 87% (n = 369)   |
|        |            | A               | 13% (n = 55)    |
|        |            | GG              | 75% (n = 160)   |
|        |            | GA              | 23% (n = 49)    |
|        |            | AA              | 2% (n = 3)      |
| CYP2C9 | rs1799853  | C               | 88% (n = 374)   |
|        |            | T               | 12% (n = 50)    |
|        |            | CC              | 77% (n = 164)   |
|        |            | CT              | 22% (n = 46)    |
|        |            | TT              | 1% (n = 2)      |
|        | rs28371685 | C               | 99.7% (n = 423) |
|        |            | T               | 0.3% (n = 1)    |
|        |            | CC              | 99.5% (n = 211) |
|        |            | CT              | 0.5% (n = 1)    |
|        |            | TT              | 0%              |
|        | rs28371686 | C               | 100% (n = 424)  |
|        |            | G               | 0%              |
|        |            | CC              | 100% (n = 212)  |
|        |            | CG              | 0%              |
|        |            | GG              | 0%              |

Table S3 (continued)

| Gene | SNP ID     | Allele/Genotype | % (n)          |
|------|------------|-----------------|----------------|
|      | rs4086116  | C               | 77% (n = 325)  |
|      |            | T               | 23% (n = 99)   |
|      |            | CC              | 58% (n = 123)  |
|      |            | TC              | 37% (n = 79)   |
|      |            | TT              | 5% (n = 10)    |
|      | rs72558191 | T               | 100% (n = 420) |
|      |            | G               | 0%             |
|      |            | TT              | 100% (n = 210) |
|      |            | TG              | 0%             |
|      |            | GG              | 0%             |
|      | rs9332131  | A               | 100% (n = 422) |
|      |            | AA              | 100% (n = 211) |
|      |            | Del             | 0%             |
|      | rs9332239  | C               | 100% (n = 424) |
|      |            | T               | 0%             |
|      |            | CC              | 100% (n = 212) |
|      |            | CT              | 0%             |
|      |            | TT              | 0%             |
|      | rs1057910  | A               | 90% (n = 383)  |
|      |            | C               | 10% (n = 41)   |
| AA   |            | 80% (n = 171)   |                |
| AC   |            | 20% (n = 41)    |                |
| CC   |            | 0%              |                |
